# Supplementary material for: AI-NAOS: An AI-Based Nonspherical Aerosol Optical Scheme for Chemical Weather Model GRAPES_Meso5.1/CUACE
Source: Copernicus journal article supplement (doi:10.5194/gmd-2024-51), 2024-06-04
Supplement: Supplementary file [file gmd-2024-51-AC3-supplement.pdf]

**RC1: 'Comment on gmd-2024-51', Anonymous Referee #1, 12 Jul 2024**

This manuscript introduces a deep learning approach to estimate the optical properties of internally mixed aerosol particles, considering the non-sphericity of insoluble particles. The research has significant implications for atmospheric models.

**Response:** We appreciate the reviewer's positive feedback and constructive suggestions for improving the manuscript.

**Comments for Improvement:**

1. Generalizability: While the discussed machine learning (ML) approach demonstrates impressive accuracy, concerns remain about its generalizability. ML-based algorithms often struggle with generalization beyond their training data (Kumar et al., 2024). The authors should address this issue explicitly.

**Response:** Thanks for your comment. Appendix C (Line 538) was included in the revised manuscript with more discussions about the DNN generalizability.

**Appendix C. The DNN Generalizability**

To assess the generalizability of the DNN, we compared its predictions against the rigorous results obtained from the IITM for microphysical parameters not included in the database. Given that the parameter range in the database encompasses nearly all potential values of refractive indices and volume fractions, our focus was primarily on evaluating the interpolation accuracy. Specifically, we chose complex refractive indices of  $1.33+0i$  for hygroscopic aerosols (coat) and  $1.95+0.79i$  for black carbon (core), with a volume fraction set at 0.33. However, we examined the performance of both interpolation and extrapolation in terms of the size parameter, which extended beyond the database maximum value of 16 to 24. We did not consider size parameters larger than 24, due to the significant increase in computational time required by the IITM and the rarity of particles exceeding these values in reality. As illustrated in Figure A2, the RMSE values of bulk extinction coefficient, single-scattering albedo, and asymmetry factor were 0.0149, 0.0065, and 0.0050, respectively. At the size parameter of 24, the errors of these three bulk optical properties were +0.012, -0.004, +0.001, respectively. Overall, the DNN demonstrated good generalizability. It is worth noting that the size parameter in this study was defined for the midpoint of the size bin. For a more detailed analysis of the DNN's generalizability for the single-scattering properties without size integration, please refer to Wang et al. (2023b).

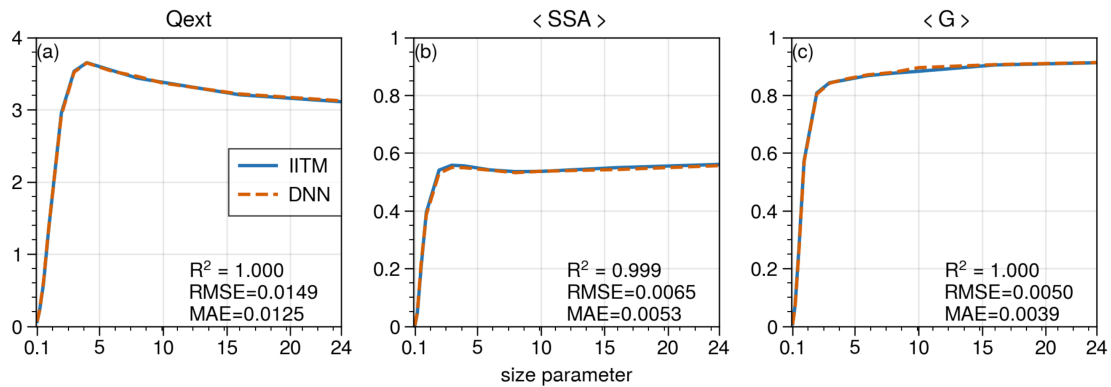

**Figure A2.** Comparison of bulk optical properties of encapsulated fractal aggregates computed from the IITM and DNN: (a) extinction coefficient, (b) single-scattering albedo, and (c) asymmetry factor. The complex refractive indices of hygroscopic aerosols and BC were  $1.33+0i$  and  $1.95+0.79i$ , respectively. The volume fraction was 0.33.

2. Comparison with Observed AOD: Including a comparison of results with observed Aerosol Optical Depth (AOD) would enhance the manuscript. This validation step provides valuable context.

**Response:** Thanks for your valuable suggestion. We have incorporated a comparison between MODIS AOD product and our model simulations into the manuscript, specifically in Line 313.

As shown in Figure 6, we have used the daily AOD product from the Moderate Resolution Imaging Spectroradiometer (MODIS) to validate our simulations on January 13. The spatial distribution of AOD observed by MODIS exhibits a similar pattern to our simulations, with high AOD values detected over three regions characterized by high anthropogenic emissions: the Sichuan Basin, the Middle Yangtze Plain, and the North China Plain.

To gain a better understanding of AOD distribution pattern, we calculated the probability distribution function (PDF) over a wide region where high AOD values were observed ( $105\text{--}118^\circ\text{E}$ ,  $27\text{--}40^\circ\text{N}$ ). Due to the presence of missing values in the MODIS AOD product, corresponding values in our simulations were also omitted. The simulations reveal a more concentrated distribution pattern, with the highest AOD values being slightly lower than those observed by MODIS. The median values of simulated AOD within external-mixing, AI-NAOS, core-shell, and volume-mixing schemes are 0.206, 0.225, 0.232, and 0.238, respectively. The MODIS median value of 0.217 falls between the external-mixing and AI-NAOS schemes, indicating a good agreement between our simulations and the observations.

This validation step provides valuable context and enhances the robustness of our findings.

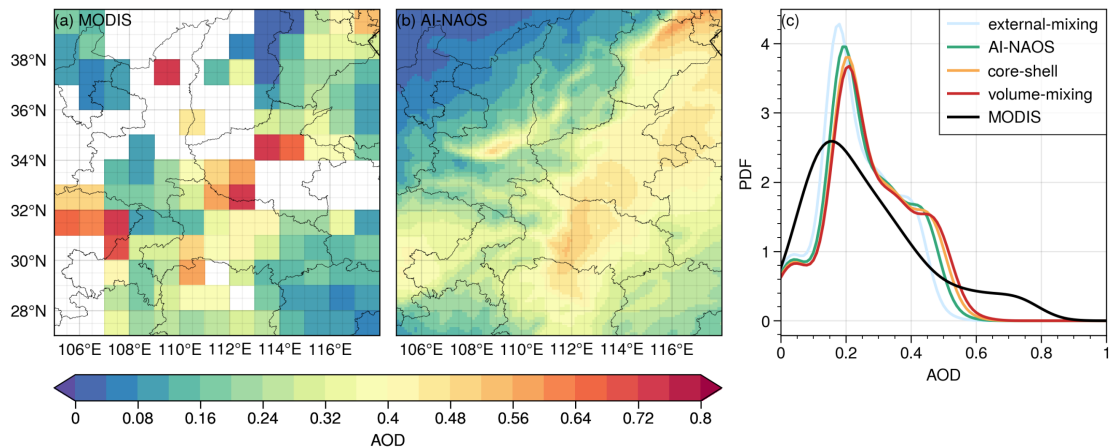

**Figure 6.** Spatial distribution of daily AOD on January 13 from (a) MODIS product [MOD08\_D3] and (b) simulations with AI-NAOS. (c) AOD probability distribution function of the MODIS product and simulations with external-mixing, AI-NAOS, core-shell, and volume-mixing schemes.

3. Time Complexity: The authors do not discuss the time complexity of the developed approach. One of the main reasons scientists are increasingly pursuing ML is due to its computational cost advantages.

**Response:** Regarding the time complexity involved in the current ML study, we would like to highlight the following points:

(1) Once the DNN is well trained from the IITM database, the DNN is significantly faster than the IITM for obtaining new results. The DNN demonstrates excellent generalizability, ensuring prediction accuracy, albeit slightly lower than the IITM results. This aligns with the main reason of increasingly pursuing ML in a broad scientific community.

(2) In the CUACE model, there should not be a significant difference between calling the DNN and using look-up-table, as the look-up-table method is generally quite efficient. The primary advantage of the DNN lies in its high flexibility and accuracy rather than its speed. Appendix D (Line 556) was included in the revised manuscript with more discussions about the time complexity.

#### Appendix D. Time Complexity

Once the DNN is well trained from the IITM database, the DNN is significantly faster than the IITM for obtaining new results. An experiment was carried out on a dual-CPU node equipped with 28 processors (Intel Xeon E5-2680 v4). As a parallel algorithm, the IITM leveraged all 28 threads to compute the optical properties of a single particle. Subsequently, bulk optical properties were obtained based on 10 quadrature points. In contrast, the DNN was employed to directly calculate the inferred values within a single thread over a million iterations. The results, illustrated in Figure A3, demonstrate a clear trend: the computational cost of IITM increases sharply with the size parameter, whereas the inference time of DNN remains relatively stable. Compared to the IITM, the computational efficiency of the DNN was found to be  $10^9$ ,  $10^{10}$ ,  $10^{11}$ , and  $10^{12}$  times higher for size parameters of 2.0, 3.0, 8.0, and

16.0, respectively. Notably, the DNN has been verified as a reliable acceleration algorithm, even for the efficient Lorenz–Mie theory, achieving a speedup of  $10^3$  times (Kumar et al., 2024).

In weather chemical models, the aerosol optical properties were commonly accessed using look-up tables. However, directly comparing the AI-NAOS scheme with the look-up table method was challenging due to the lack of integration of the bulk optical property database into weather chemical models. Therefore, we evaluated AI-NAOS against other existing schemes, including the external-mixing scheme in GRAPES\_Meso5.1/CUACE, core-shell and volume-mixing schemes in WRF-Chem V4.2.1. Additionally, we introduced a modified version of AI-NAOS scheme, denoted as AI-NAOS\*, which excluded DNN inference for zero AOD case, allowing for the separation of prior processes for internal mixing and the DNN inference. We conducted triplicate 12-hour simulations with 75,551 grids using 4 nodes, with a grid spacing of  $0.1^\circ$  for GRAPES/CUACE and 9 km for WRF-Chem. The total computation times for these simulations are summarized in Figure A3. Compared to core-shell and volume-mixing schemes, the AI-NAOS required an additional 2.2% and 2.8% of computational time, respectively. In contrast, when compared to the external-mixing scheme, the AI-NAOS needed extra 17.7% of time, which was comprised of 6.2% for the DNN inference and 11.4% for prior processes. Generally, there was not substantial difference between invoking the DNN and using look-up tables.

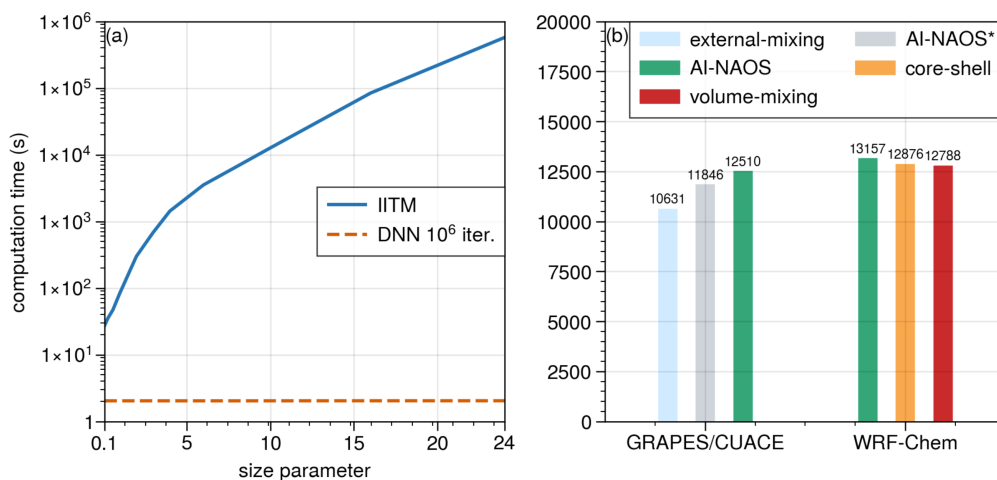

**Figure A3.** (a) Comparison of computation time required by the IITM and DNN. (b) Comparison of computation time for simulations, showcasing the differences between external-mixing, AI-NAOS, core-shell, and volume-mixing schemes.

4. Figure 3: Clarify whether the results in Figure 3 pertain to the test or training dataset. Additionally, provide details on pre-processing and post-processing steps, which are currently missing.

**Response:** Thank you for pointing out the missing information. To clarify, the data points presented were randomly sampled from the entire dataset, which includes training, validation, and testing sets. Actually, the data were not subjected to any pre-processing steps. For further reference, please refer to Appendix B, which is also mentioned in our response to Comment 5.

5. Tuning of Hyperparameters: While the network's results are extraordinary, the manuscript lacks information on hyperparameters and their tuning. Including this would improve transparency.

**Response:** Thanks for your suggestion. We have included Appendix B to elaborate on the DNN training and hyperparameter tuning process (Line 516).

## Appendix B. Training of DNN and Tuning of Hyperparameters

All DNNs used in this study were trained using the same architecture and configurations. Here, we specifically discuss the DNN for the encapsulated fractal model.

Firstly, the dataset of bulk optical properties was divided into three parts: 75% for training, 10% for validation, and 15% for testing. Since the dataset was well-organized, these three parts were randomly sampled without redistribution. Notably, the training dataset was not subjected to pre-processing such as normalization. We found that the DNN performed well even without the pre-processing step, making it more convenient for application as no additional data transforms were required before and after inference.

Next, a series of configurations were determined. Based on the same DNN architecture, the Leaky Rectified Linear Unit with a negative slope of 0.01 was chosen as the activation function. The loss value was calculated using RMSE, and the parameters of DNN was optimized using the Adam algorithm. Several hyperparameters, including batch size, initial learning rate, and number of nodes in the first fully connected (FC) layer, were fine-tuned. The learning rate was annealed using a cosine function and the number of nodes in subsequent hidden layers was set to be half of the number in the first FC layer. To determine the optimal hyperparameters, the Asynchronous Successive Halving Algorithm (ASHA) was employed. The search process was allowed to proceed for a maximum of 200 epochs, unless early stopping criteria were met. The results of the hyperparameter tuning are summarized in Table A2.

It was clear from the results that the loss value decreased as the number of nodes increased, but this improvement became less significant when the number of nodes exceeded 40. After balancing DNN performance and efficiency, the number of nodes in the first FC layer, batch size, and initial learning rate were set to the values of 40, 200, and  $5 \times 10^{-3}$ , respectively.

**Table A2. Optimal values of hyperparameters**

| Nodes of first FC layer | Batch size | Initial learning rate | Loss value in validation |
|-------------------------|------------|-----------------------|--------------------------|
| 60                      | 100        | $10^{-3}$             | $2.3 \times 10^{-3}$     |
| 50                      | 100        | $10^{-3}$             | $2.6 \times 10^{-3}$     |
| 40                      | 200        | $5 \times 10^{-3}$    | $3.4 \times 10^{-3}$     |
| 30                      | 100        | $5 \times 10^{-3}$    | $8.8 \times 10^{-3}$     |
| 20                      | 200        | $5 \times 10^{-3}$    | $1.2 \times 10^{-2}$     |

6. Methodology Reorganization: Consider reorganizing the methodology section. Present results from AI-NAOS (lines 174-190, including Figure 2) after describing the approach in detail.

**Response:** Thanks for your suggestion. This part was moved to Line 212.

7. Move lines 208-216 and Figure 3 to the results section for better flow.

**Response:** Thanks for your suggestion. This part was moved to the result section as a new subsection titled “3.1 Performance of Deep Neural Networks” (Line 259). Furthermore, the “model configuration” subsection was moved to method section (Line 232).

The following are additional revisions:

1. Figure 1 were displayed in another viewing angle for better understanding.

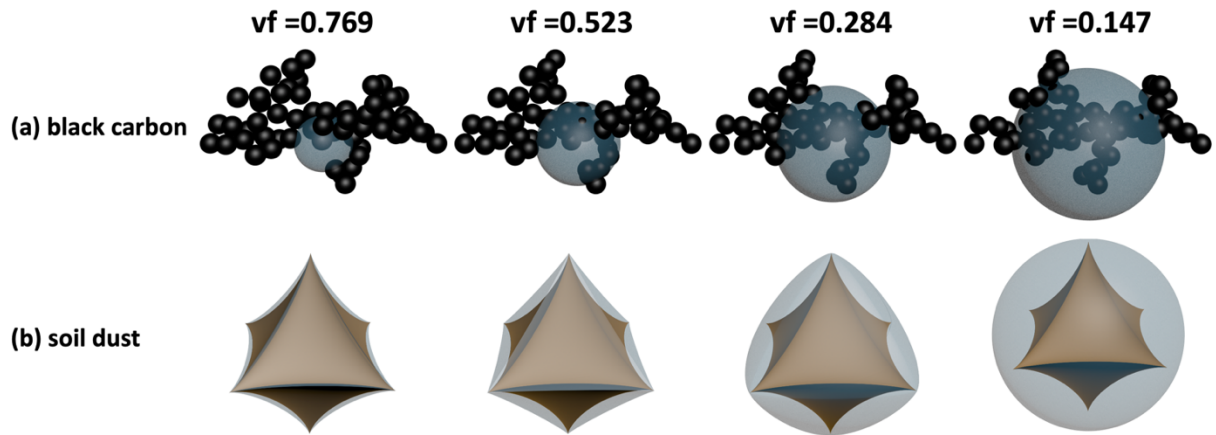

Figure 1. Optical modelling for (a) fractal aggregates framework of black carbon (BC) partially encapsulated with spherical coating of hygroscopic aerosols and (b) super-spheroid framework of soil dust (SD) fully coated with another super-spheroid of hygroscopic aerosols with various volume fractions.

2. A figure was added to illustrate the framework of AI-NAOS module (Figure 2).

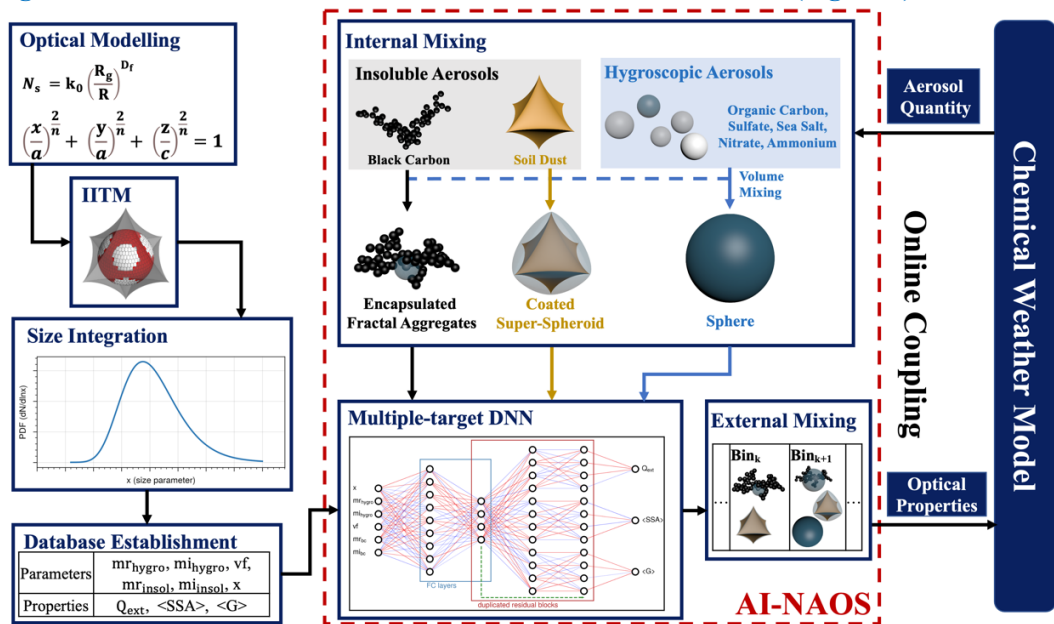

Figure 2. The framework of AI-NAOS module.

3. Figure 10 was modified. Pressure levels ranged from 700 hPa to the surface instead of 1000 hPa in the new version and vertical averaged values were corrected. The main conclusion, “The NSIH effect could enhance the short-wave heating rate, reaching 20%”, was changed to “The NSIH effect could enhance the short-wave heating rate, reaching 23%”.

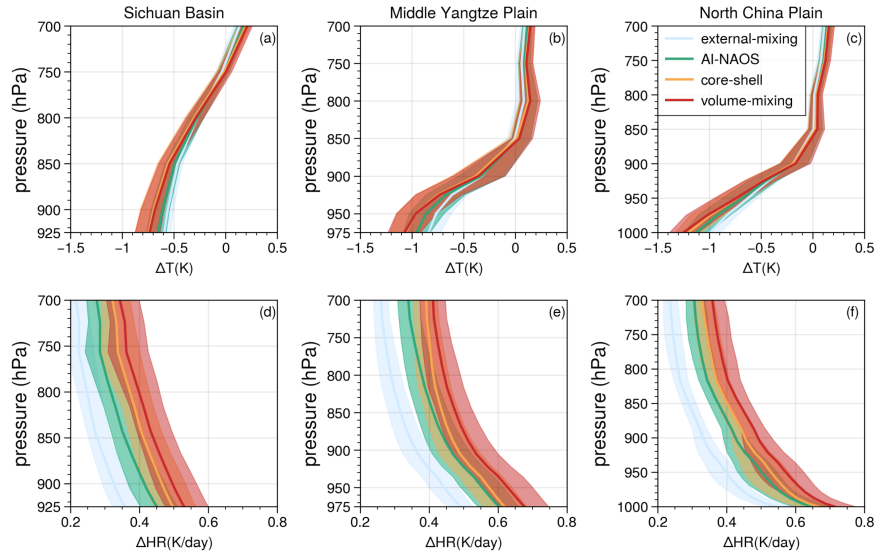

Figure 10. Vertical profiles of (a-c) temperature and (d-f) short-wave heating rate anomalies based on four aerosol optical schemes (external-mixing, AI-NAOS, core-shell, and volume-mixing). The solid lines represent the median value and the shaded areas encompass the range from the 25 to 75 percentage.

4. The colour schemes were modified in Figure 3, 7, 8, 10, for the convenience of readers with colour vision deficiencies.

5. The repository for GRAPES\_Meso5.1/CUACE was added (Line 585)

The repository for GRAPES\_Meso5.1/CUACE developed by Wang et al., 2022a, is in Zenodo (<https://zenodo.org/records/7075751>).
